# Supplementary material
Source: publisher figshare collection journal article supplement (https://wellcome.figshare.com/articles/dataset/_/12827786)
Supplement: Supplementary file 1 [file 1]

## Sheet: WT-clin-trials-post-May18
ID	Required to comply with May18 policy	Grant code	Trial Title	Grantholder Organisation	Grant Type	Grant Start Date	Grant End Date	Trial registry ID	Trial registry	Trial start date	Trial end date	APR or EoG report 2018-20	Protocol available	SAP available	Summary results posted	Plan to share IPD	Wellcome listed as a funder/collaborator on registry?	Grant no listed on registry?
1	No	079113/Z/06/Z	A transdiagnostic comparison of enhanced cognitive behaviour therapy (CBT-E) and interpersonal psychotherapy in the treatment of eating disorders	University of Oxford	Principal Research Fellowship Renewal	2006-10-01	2018-12-31	ISRCTN15562271	ISRCTN Registry	2001-10-01	2014-10-15	Y	N	N	N	N	Y	Y
2	No	089725/B/09/Z	International Programme to evaluate the Polycap in a large randomised controlled clinical trial in a primary prevention setting (TIPS)	Hamilton Health Sciences Corporation	Affordable Healthcare in India Award	2010-01-01	2021-01-10	NCT01646437	ClinicalTrials.gov	2012-06-01	2019-06-30	N	missing	missing	N	Undecided	Y	N
3	No	095564/Z/11/Z	TRIAC in MCT8 deficiency	University of Cambridge	Investigator Award in Science	2011-08-01	2018-07-31	NCT02060474	ClinicalTrials.gov	2014-10-01	2018-06-26	Y	missing	missing	N	missing	N	N
4	No	095531/Z/11/Z	Low dosE GlibENclamide in Diabetes Part A (LEGEND-A)	University of Oxford	Investigator Award in Science	2011-10-01	2020-01-31	NCT02830048	ClinicalTrials.gov	2016-07-01	2017-03-09	Y	N	missing	N	Y	N	N
5	No	095752/Z/11/Z	Development of TIPS Microspheres for the Treatment of Fistulas	University College London	Translation Award	2011-10-17	2020-05-30	NCT03707769	ClinicalTrials.gov	2017-03-15	2021-09-01	N	Y	missing	N	missing	missing	missing
6	No	095967/Z/11/Z	Vaccines to prevent invasive non-typhoidal Salmonella infections in infants and young children in sub-Saharan Africa.	University of Maryland	Strategic Translation Award (Pre-CCGT)	2012-05-14	2020-08-30	NCT03981952	ClinicalTrials.gov	2019-10-28	2021-09-30	N	N	missing	N	missing	missing	missing
7	No	097922/Z/11/Z	Cambridge Stem Cell Institute.	University of Cambridge	Wellcome Trust Centre	2012-07-01	2018-06-30	missing	missing	missing	missing	N	missing	missing	missing	missing	missing	missing
8	No	098461/Z/12/Z	The Nightmare Intervention Study: a pilot randomised controlled trial of a brief cognitive behaviour	University of Oxford	Strategic Award - Science	2012-10-19	2018-09-30	NCT03012685	ClinicalTrials.gov	2016-11-01	2018-02-28	Y	missing	missing	N	Y	N	N
9	No	100087/Z/12/Z	Probiotic treatment for acute watery diarrhoea in Vietnamese children	University of Oxford	Sir Henry Dale Fellowship	2013-07-01	2018-09-01	ISRCTN88101063	ISRCTN Registry	2014-09-26	2015-09-26	Y	Y	missing	N	missing	Y	Y
10	No	100917/Z/13/Z	A Prospective Open-Label Study to Evaluate the Safety of the Meniscal Repair Scaffold, FibroFix™ Men	Orthox Limited	Translation Award	2013-07-01	2021-09-30	NCT02205645	ClinicalTrials.gov	2015-04-01	2017-10-17	Y	missing	missing	N	missing	N	N
11	No	101103/Z/13/Z	A Single-blind Stepped Wedge Cluster Randomized Controlled Behaviour Change Trial to Determine Effec	University of Oxford	International Intermediate Fellowship - Full	2013-09-01	2019-08-31	NCT02089152	ClinicalTrials.gov	2014-04-01	2019-06-30	Y	Y	missing	N	missing	Y	Y
12	No	101999/Z/13/Z	VNRX-5133 SAD/MAD Safety and PK in Healthy Adult Volunteers	VenatoRx Pharmaceuticals Incorporated	Translation Fund	2013-10-22	2018-07-31	NCT02955459	ClinicalTrials.gov	2016-11-01	2017-06-30	Y	missing	missing	N	missing	N	N
13	No	101798/Z/13/Z	Neural and cognitive processes in depression.	University College London	Investigator Award in Science	2014-05-07	2020-06-30	missing	missing	missing	missing	N	N	missing	missing	missing	missing	missing
14	No	103383/Z/13/Z	PURAK: Wearable Devices for Distal Arm Functionality Rehabilitation.	Indian Institute of Science	Affordable Healthcare in India Award	2014-06-01	2019-02-07	missing	missing	missing	missing	Y	missing	missing	missing	missing	missing	missing
15	No	104750/Z/14/Z	A multi-component high efficacy malaria vaccine	University of Oxford	Senior Investigator Award	2014-09-01	2019-08-31	NCT03203421	ClinicalTrials.gov	2017-07-03	2017-12-20	Y	N	N	N	N	N	N
16	No	092654/Z/10/C	YEFE	University of Oxford	Africa and Asia Programmes	2014-10-01	2020-05-01	NCT02991495	ClinicalTrials.gov	2017-11-06	2018-02-21	Y	missing	missing	N	Undecided	N	N
17	No	092654/Z/10/C	Immunogenicity and Safety of Fractional Doses of Yellow Fever Vaccines (YEFE)	Kemri-Wellcome Trust Research Programme	Vaccines	2014-10-01	2020-05-01	NCT02991495	ClinicalTrials.gov	2017-11-06	2018-02-21	N	missing	missing	N	Undecided	N	N
18	No	102568/Z/13/Z	Albumin to prevent infection in Acute-on-Chronic Liver Failure (Acronym: ATTIRE Albumin To prevenT Infection in liveR failurE)	University College London	Health Innovation Challenge Fund Award	2014-10-01	2019-08-31	2014-002300-24	EudraCT	2015-03-20	2019-12-11	Y	missing	missing	N	missing	Y	N
19	No	104803/Z/14/Z	Study to Evaluate the Efficacy of GlaxoSmithKline (GSK) Biologicals' Candidate Tuberculosis (TB) Vaccine in Adults_x000D_	Imperial College London	Senior Research Fellowship Clinical Renewal	2014-10-01	2019-09-30	NCT01755598	ClinicalTrials.gov	2014-08-19	2018-11-16	Y	N	N	N	N	N	N
20	No	104803/Z/14/Z	Using Biomarkers to Predict TB Treatment Duration_x000D_	Imperial College London	Senior Research Fellowship Clinical Renewal	2014-10-01	2019-09-30	NCT02821832	ClinicalTrials.gov	2016-06-29	2022-12-30	Y	N	N	N	N	N	N
21	No	104803/Z/14/Z	Using Biomarkers to Predict TB Treatment Duration	Imperial College London	Senior Research Fellowship Clinical Renewal	2014-10-01	2019-09-30	NCT02880982	ClinicalTrials.gov	2017-03-14	2022-03-01	Y	N	N	N	N	N	N
22	No	104803/Z/14/Z	Preventing TB-IRIS in High-risk Patients: a Randomized Placebo-controlled Trial of Prednisone (Pred-ART)_x000D_	Imperial College London	Senior Research Fellowship Clinical Renewal	2014-10-01	2019-09-30	NCT01924286	ClinicalTrials.gov	2013-08-30	2016-04-01	Y	N	N	N	N	N	N
23	No	104803/Z/14/Z	Efficacy Against TB Disease, Safety, and Immunogenicity of MVA85A/AERAS-485 in HIV-Infected Adults (C-030-485)	Imperial College London	Senior Research Fellowship Clinical Renewal	2014-10-01	2019-09-30	NCT01151189	ClinicalTrials.gov	2011-07-01	2014-09-30	Y	N	N	Y	N	N	N
24	No	104059/Z/14/A	Development of novel, boron-containing small molecules for the treatment of Chagas disease	Anacor Pharmaceuticals Inc.	Seeding Drug Discovery Award	2014-10-15	2020-07-31	missing	missing	missing	missing	N	missing	missing	missing	missing	missing	missing
25	No	106329/Z/14/Z	Development of a small molecule inhibitor of EBNA1 to treat Epstein-Barr Virus (EBV) latent infection and associated disease	Wistar Institute	Seeding Drug Discovery Award	2014-11-15	2019-03-31	missing	missing	missing	missing	N	N	missing	missing	missing	missing	missing
26	No	103782/Z/14/Z	Identification and Prediction of Coronary Artery Plaque Rupture Using 18F-Fluoride Positron Emission Tomography (The PRE18FFIR Study)	University of Edinburgh	Investigator Award in Science	2015-01-01	2021-12-31	NCT02278211	ClinicalTrials.gov	2015-10-01	2020-06-30	Y	N	N	N	N	Y	N
27	No	104613/Z/14/Z	Non-Blood Contacting Biventricular Cardiac Assist Device That Promotes Heart Restoration.	CorInnova	Translation Fund	2015-01-01	2020-01-30	Not started yet	n/a	2021-05-01	n/a	Y	Y	n/a	n/a	n/a	n/a	n/a
28	No	106680/Z/14/Z	Intrathecal Immunoglobulin for treatment of adult patients with tetanus: a randomized controlled 2x2	OUCRU	Africa and Asia Programmes	2015-01-01	2020-10-01	NCT02999815	ClinicalTrials.gov	2017-02-13	2019-12-31	N	N	missing	N	missing	N	N
29	No	106680/Z/14/Z	A randomized trial of Tamoxifen combined with amphotericin B and fluconazole for cryptococcal mening	OUCRU	Africa and Asia Programmes	2015-01-01	2020-10-01	NCT03112031	ClinicalTrials.gov	2017-10-10	2019-08-31	N	N	missing	N	missing	N	N
30	No	106680/Z/14/Z	A pilot study to assess shortened therapy for hepatitis C infected adults in Vietnam	OUCRU	Africa and Asia Programmes	2015-01-01	2020-10-01	ISRCTN17100273	ISRCTN Registry	2017-04-01	2020-11-30	N	N	missing	missing	missing	N	N
31	No	106680/Z/14/Z	Parallel Group, Double Blinded, 1:1, Randomized Controlled Phase III Trial of Co-trimoxazole Versus	OUCRU	Africa and Asia Programmes	2015-01-01	2020-10-01	NCT02773407	ClinicalTrials.gov	2016-06-26	2019-05-31	N	N	missing	N	Y	Y	N
32	No	106680/Z/14/Z	SURE: Short intensive treatment for children with tuberculous meningitis.	OUCRU	Africa and Asia Programmes	2015-01-01	2020-10-01	ISRCTN40829906	ISRCTN Registry	2019-09-01	2021-04-04	N	N	missing	missing	missing	Y	N
33	No	106680/Z/14/Z	A Randomised Controlled Trial of Continuous Endotracheal Cuff Pressure Control for the Prevention of	OUCRU	Africa and Asia Programmes	2015-01-01	2020-10-01	NCT02966392	ClinicalTrials.gov	2016-11-01	2019-03-31	N	missing	missing	N	Undecided	N	N
34	No	106680/Z/14/Z	A Phase 2 interventional, multicenter, randomized open-label study to determine the effective and to	OUCRU	Africa and Asia Programmes	2015-01-01	2020-10-01	NCT03167242	ClinicalTrials.gov	2017-08-02	2019-09-26	N	missing	missing	N	missing	N	N
35	No	106680/Z/14/Z	An Open Label, Non-comparative, Multicenter Study to Assess the Pharmacokinetics, Safety and Efficac	OUCRU	Africa and Asia Programmes	2015-01-01	2020-10-01	NCT02563496	ClinicalTrials.gov	2017-02-06	2019-09-30	N	Y	missing	N	missing	N	N
36	No	106698/Z/14/Z	Bioequivalence study of a New Formulation of Artesunate (IVASBE)	MORU	Africa and Asia Programmes	2015-01-01	2020-09-30	TCTR20170907002	Thai Clinical Trials Registry (TCTR)	2018-01-22	2018-07-25	Y	missing	missing	N	missing	N	N
37	No	106698/Z/14/Z	Vulnerabilities & Abilities of Women, Children, & Families in Health Research in Chiang Rai Province	MORU	Africa and Asia Programmes	2015-01-01	2020-09-30	TCTR20181024005	Thai Clinical Trials Registry (TCTR)	2018-03-13	2021-03-13	Y	missing	missing	N	missing	Y	Y
38	No	106698/Z/14/Z	Field Evaluation of a Device for Automated Malaria Microscopy	MORU	Africa and Asia Programmes	2015-01-01	2020-09-30	NCT02932072	ClinicalTrials.gov	2016-11-10	2018-11-30	N	N	missing	N	N	N	N
39	No	106698/Z/14/Z	A randomised controlled study of the use of recovery positions for comatose patients in Bangladesh	MORU	Africa and Asia Programmes	2015-01-01	2020-09-30	NCT02427633	ClinicalTrials.gov	2014-08-23	2019-05-31	N	N	missing	N	missing	N	N
40	No	106698/Z/14/Z	Monitoring Pneumococcal Conjugate Vaccine Introduction in Cambodia	MORU	Africa and Asia Programmes	2015-01-01	2020-09-30	NCT03331952	ClinicalTrials.gov	2015-08-03	2018-08-31	N	N	missing	N	missing	N	N
41	No	106698/Z/14/Z	Genetic epidemiology of P. falciparum malaria and associated antimalarial drug resistance	MORU	Africa and Asia Programmes	2015-01-01	2020-09-30	NCT03384498	ClinicalTrials.gov	2016-10-01	2019-10-31	N	N	missing	N	missing	N	N
42	No	106698/Z/14/Z	Pharmacokinetics and Pharmacodynamics of Ivermectin in Pediatric Dengue Patients (PKIDEN)	MORU	Africa and Asia Programmes	2015-01-01	2020-09-30	NCT03432442	ClinicalTrials.gov	2018-09-04	2019-07-31	N	N	missing	N	missing	N	N
43	No	106698/Z/14/Z	Fluid and vasopressor therapy in adult patients with severe malaria or severe sepsis	MORU	Africa and Asia Programmes	2015-01-01	2020-09-30	NCT03641534	ClinicalTrials.gov	2018-06-04	2019-09-30	N	N	missing	N	missing	N	N
44	No	106698/Z/14/Z	Vulnerabilities & Abilities of Women & Families in Health Research on the Thai-Myanmar border	MORU	Africa and Asia Programmes	2015-01-01	2020-09-30	TCTR20180921001	Thai Clinical Trials Registry (TCTR)	2017-11-10	2020-05-10	N	N	missing	N	missing	Y	Y
45	No	106698/Z/14/Z	Impact of malaria infection in pregnancy on fetal and newborn growth	MORU	Africa and Asia Programmes	2015-01-01	2020-09-30	NCT00840502	ClinicalTrials.gov	2009-02-01	2019-09-30	N	missing	missing	N	missing	N	N
46	No	106698/Z/14/Z	Fixed dose and extended course ACTs for the treatment of uncomplicated malaria in pregnancy	MORU	Africa and Asia Programmes	2015-01-01	2020-09-30	NCT01054248	ClinicalTrials.gov	2010-02-16	2020-01-31	N	missing	missing	N	missing	N	N
47	No	106698/Z/14/Z	Prevalence survey of Plasmodium Falciparum antimalarial drug resistance markers in Chad	MORU	Africa and Asia Programmes	2015-01-01	2020-09-30	NCT02895568	ClinicalTrials.gov	2016-09-16	2018-09-06	N	missing	missing	N	Undecided	N	N
48	No	106698/Z/14/Z	Improving SCBU care for preterm neonates	MORU	Africa and Asia Programmes	2015-01-01	2020-09-30	NCT03512093	ClinicalTrials.gov	2018-05-01	2019-05-31	N	missing	missing	N	Undecided	N	N
49	No	106698/Z/14/Z	Epidemiology of malaria in Ubon Ratchathani, Thailand: a case-control study	MORU	Africa and Asia Programmes	2015-01-01	2020-09-30	NCT02991963	ClinicalTrials.gov	2016-12-01	2018-12-31	N	missing	missing	N	Y	N	N
50	No	106698/Z/14/Z	Molecular signature of Karen and Burmese children until two years of age, Thailand--Myanmar border	MORU	Africa and Asia Programmes	2015-01-01	2020-09-30	NCT03104673	ClinicalTrials.gov	2017-04-30	2019-04-30	N	missing	missing	N	Y	N	N
51	No	106698/Z/14/Z	Molecular signature of Karen and Burmese pregnant women on the Thailand-Myanmar border	MORU	Africa and Asia Programmes	2015-01-01	2020-09-30	NCT02797327	ClinicalTrials.gov	2016-09-01	2019-03-31	N	missing	missing	N	Y	N	N
52	No	106698/Z/14/Z	A prospective cohort study on the etiology of neonatal hyperbilirubinemia	MORU	Africa and Asia Programmes	2015-01-01	2020-09-30	NCT02361788	ClinicalTrials.gov	2015-02-01	2019-09-30	N	missing	missing	N	missing	N	N
53	No	106698/Z/14/Z	Pharmacokinetic Interactions of Orally Administered Artemether-lumefantrine, Amodiaquine and Primaqu	MORU	Africa and Asia Programmes	2015-01-01	2020-09-30	NCT02696954	ClinicalTrials.gov	2016-11-18	2019-12-31	N	missing	missing	N	missing	N	N
54	No	106698/Z/14/Z	Eschar investigations in scrub typhus (Chiang Rai, Thailand)	MORU	Africa and Asia Programmes	2015-01-01	2020-09-30	NCT02915861	ClinicalTrials.gov	2017-06-30	2019-06-30	N	missing	missing	N	missing	N	N
55	No	106698/Z/14/Z	A clinical and PK study of Hepatitis C treatment (sofosbuvir+daclatasvir) in Myanmar	MORU	Africa and Asia Programmes	2015-01-01	2020-09-30	NCT03158857	ClinicalTrials.gov	2018-11-01	2021-12-31	N	missing	missing	N	missing	N	N
56	No	106698/Z/14/Z	Causes and impact of anemia on pregnancy outcome on the Thai-Myanmar Border	MORU	Africa and Asia Programmes	2015-01-01	2020-12-31	NCT03174652	ClinicalTrials.gov	2017-07-20	2018-07-20	N	missing	missing	N	missing	N	N
57	No	106698/Z/14/Z	Plasmodium vivax infections presenting with severe symptoms from 2001 to 2013 in NW Thailand	MORU	Africa and Asia Programmes	2015-01-01	2020-09-30	NCT03307369	ClinicalTrials.gov	2017-10-27	2019-06-30	N	missing	missing	N	missing	N	N
58	No	106698/Z/14/Z	Utility of Sepsis-3 definition in community-acquired sepsis in Ubon Ratchathani, Northeast Thailand	MORU	Africa and Asia Programmes	2015-01-01	2020-09-30	NCT03379402	ClinicalTrials.gov	2018-02-01	2020-06-30	N	missing	missing	N	missing	N	N
59	No	106698/Z/14/Z	REducinG Antibiotics tReatment Duration for Ventilator-Associated Pneumonia (REGARD-VAP)	MORU	Africa and Asia Programmes	2015-01-01	2020-09-30	NCT03382548	ClinicalTrials.gov	2018-02-26	2021-06-30	N	missing	missing	N	missing	N	N
60	No	106698/Z/14/Z	Randomized Controlled Trial of an Evidence-informed Parenting Intervention to Prevent Violence Again	MORU	Africa and Asia Programmes	2015-01-01	2020-09-30	NCT03539341	ClinicalTrials.gov	2018-12-11	2019-12-31	N	missing	missing	N	missing	N	N
61	No	106698/Z/14/Z	A study of the PK/PD properties of oral miltefosine for cutaneous leishmaniasis in Afghanistan	MORU	Africa and Asia Programmes	2015-01-01	2020-09-30	TCTR20180710007	Thai Clinical Trials Registry (TCTR)	2019-02-01	2020-11-01	N	missing	missing	N	missing	N	N
62	No	106698/Z/14/Z	Automated Malaria Microscopy: Parasite clearance estimation and cost effectivetiveness	MORU	Africa and Asia Programmes	2015-01-01	2020-09-30	TCTR20180802001	Thai Clinical Trials Registry (TCTR)	2017-11-01	2018-09-01	N	missing	missing	N	missing	N	N
63	No	106698/Z/14/Z	A comparison between 12 vs. 20 weeks of co-trimoxazole as maintenance therapy for Melioidosis	MORU	Africa and Asia Programmes	2015-01-01	2020-09-30	NCT01420341	ClinicalTrials.gov	2011-08-01	2019-06-30	N	missing	missing	missing	missing	N	N
64	No	106698/Z/14/Z	A cross-sectional study investigating prevalence of Melioidosis as a cause of pneumonia in Yangon	MORU	Africa and Asia Programmes	2015-01-01	2020-09-30	NCT03578133	ClinicalTrials.gov	2018-07-07	2019-04-11	N	missing	missing	N	missing	Y	N
65	No	106698/Z/14/Z	A randomised treatment trial of subclinical vivax infections with primaquine in Nong, Laos	MORU	Africa and Asia Programmes	2015-01-01	2020-09-30	NCT02802813	ClinicalTrials.gov	2016-06-14	2018-07-15	N	missing	missing	N	Y	Y	N
66	No	106698/Z/14/Z	An alternative regimen of primaquine as antirelapse in healthy volunteers with G6PD deficiency	MORU	Africa and Asia Programmes	2015-01-01	2020-09-30	TCTR20170830002	Thai Clinical Trials Registry (TCTR)	2018-11-21	2020-08-31	N	missing	missing	N	missing	Y	N
67	No	106698/Z/14/Z	Single low dose primaquine in African children with acute falciparum malaria and G6PD deficiency	MORU	Africa and Asia Programmes	2015-01-01	2020-09-30	ISRCTN11594437	ISRCTN Registry	2017-02-01	2020-06-01	N	missing	missing	missing	missing	Y	N
68	No	106698/Z/14/Z	Tenofovir to prevent mother-to-child transmission of hepatitis B virus (PMTCT-HBV)	MORU	Africa and Asia Programmes	2015-01-01	2020-09-30	NCT02995005	ClinicalTrials.gov	2018-05-24	2019-07-31	N	Y	missing	N	missing	N	N
69	No	106698/Z/14/Z	A multicentre observational study to describe the prevalence of scrub typhus in Mayanmar	MORU	Africa and Asia Programmes	2015-01-01	2020-09-30	NCT03269266	ClinicalTrials.gov	2017-12-04	2019-11-30	N	Y	missing	N	missing	N	N
70	No	106698/Z/14/Z	Outcome and risk factors associated with hospital-acquired antibiotic-resistant infections	MORU	Africa and Asia Programmes	2015-01-01	2020-09-30	NCT03411538	ClinicalTrials.gov	2018-03-01	2020-02-28	N	Y	missing	N	missing	N	N
71	No	106698/Z/14/Z	Prevalence survey of plasmodium falciparum antimalarial drug resistance markers in greater mekong SR	MORU	Africa and Asia Programmes	2015-01-01	2020-12-31	NCT03217851	ClinicalTrials.gov	2017-08-18	2020-08-31	N	Y	missing	N	missing	Y	N
72	No	203077/Z/16/Z	EBOVAC Salone	KEMRI	Africa and Asia Programmes	2015-01-01	2021-09-30	NCT02509494	ClinicalTrials.gov	2015-09-30	2019-08-02	N	missing	missing	N	missing	N	N
73	No	203077/Z/16/Z	COAST	KEMRI	Africa and Asia Programmes	2015-01-01	2021-09-30	ISRCTN15622505	ISRCTN Registry	2016-12-01	2020-12-01	N	missing	missing	missing	missing	Y	N
74	No	203077/Z/16/Z	TRACT	KEMRI	Africa and Asia Programmes	2015-01-01	2021-09-30	ISRCTN84086586	ISRCTN Registry	2013-01-01	2019-12-31	Y	Y	N	N	Y	N	N
75	No	104025/Z/14/Z	MIcroglial CSF1R in Alzheimer’s Disease (MICAD)	University of Cambridge	Strategic Award - Science	2015-01-18	2021-12-31	NCT04121208	ClinicalTrials.gov	2020-05-01	2020-11-30	Y	missing	N	N	Y	N	N
76	No	104025/Z/14/Z	Peripheral Immunomarker Validation in Treatment-resistant Depression (BIODEP)	University of Cambridge	Strategic Award - Science	2015-01-18	2021-12-31	NCT02752178	ClinicalTrials.gov	2015-06-01	2018-09-30	Y	missing	missing	N	Y	N	N
77	No	102028/Z/13/Z	Clinical Development of a Therapeutic Vaccine for Tuberculosis.	Infectious Disease Research Institute	Translation Fund	2015-01-22	2023-05-31	missing	missing	missing	missing	N	missing	missing	missing	missing	missing	missing
78	No	102569/Z/13/Z	Development of a synthetic bioactivated membrane dressing	University of Birmingham	Health Innovation Challenge Fund Award	2015-02-01	2019-12-31	missing	missing	missing	missing	N	missing	missing	missing	missing	missing	missing
79	No	102538/Z/13/Z	Repurposing anti-TNF for Dupuytren's disease	University of Oxford	Health Innovation Challenge Fund Award	2015-03-01	2020-09-30	ISRCTN27786905	ISRCTN Registry	2015-10-12	2020-06-30	Y	missing	missing	N	To be made available at a later date	Y	Y
80	No	104802/Z/14/Z	Phase 1 trial: T4 immunotherapy of head and neck cancer.	King's College London	Translation Fund	2015-03-01	2021-04-01	NCT01818323	ClinicalTrials.gov	2015-06-01	2020-02-28	Y	missing	missing	N	Y	N	N
81	No	104249/Z/14/Z	Development of a small molecule therapeutic for the orphan disease Creatine Transporter Deficiency, an inborn error of metabolism and autism spectrum disorder.	Lumos Pharma	Translation Fund	2015-03-16	2018-08-01	missing	missing	missing	missing	N	missing	missing	missing	missing	missing	missing
82	No	101012/Z/13/Z	TOP-ART (Trauma Organ Protection - Artesunate)	Queen Mary University of London	Health Innovation Challenge Fund Award	2015-04-01	2019-11-30	ISRCTN15731357	ISRCTN Registry	2015-04-01	2019-09-21	Y	missing	missing	N	Y	Y	Y
83	No	104908/Z/14/Z	MYRIAD: Effectiveness and cost-effectiveness of mindfulness in schools	University of Oxford	Strategic Award - Science	2015-04-01	2019-03-31	ISRCTN18013311	ISRCTN Registry	2015-06-01	2018-03-30	Y	Y	missing	N	missing	Y	Y
84	No	105828/Z/14/Z	PArtner-provided HIV Self-Testing and Linkage (PASTAL) in antenatal care clinics: methodology and delivery of an adaptive cluster-randomised trial in Blantyre, Malawi.	Liverpool School of Tropical Medicine	International Training Fellowship - Full	2015-04-01	2018-09-30	missing	missing	missing	missing	N	N	missing	missing	missing	missing	missing
85	No	106174/Z/14/Z	The melanopsin signalling pathway in ocular, circadian and sleep physiology: mechanisms to clinical application.	University of Oxford	Investigator Award in Science	2015-04-01	2022-03-31	missing	missing	missing	missing	N	Y	missing	missing	missing	missing	missing
86	No	101011/Z/13/Z	Re-purposing of 13-cis-retinoic for children with neuroblastoma	Nova Laboratories Limited	Health Innovation Challenge Fund Award	2015-05-05	2020-08-31	NCT03291080	ClinicalTrials.gov	2018-04-17	2019-08-28	Y	missing	missing	N	N	N	N
87	No	106697/Z/14/Z	Development of UCCB01-144 as a new treatment for stroke.	Avilex Pharma	Translation Fund	2015-06-10	2020-05-31	missing	missing	missing	missing	N	missing	missing	missing	missing	missing	missing
88	No	106169/Z/14/Z	A UK Hub to Catalyse Open Target Discovery.	University of Oxford	Strategic Award - Science (Pre-CCGT)	2015-07-01	2020-12-31	201900332420	EudraCT	2015-07-01	2022-04-30	N	missing	missing	N	missing	missing	missing
89	No	107496/Z/15/Z	MYRIAD: My Resilience in Adolescence, a study examining the effectiveness and cost-effectiveness of	University of Oxford	Strategic Award - Science	2015-07-01	2022-06-01	ISRCTN86619085	ISRCTN Registry	2016-06-01	2021-12-31	Y	Y	N	N	Y	Y	Y
90	No	093956/Z/10/B	Improving the treatment of malaria.	University of Oxford	Principal Research Fellowship Renewal	2015-08-01	2021-10-01	missing	missing	missing	missing	N	missing	missing	missing	missing	missing	missing
91	No	107367/Z/15/Z	Improving the management and prevention of tetanus in Vietnam.	University of Oxford	Career Re-Entry Fellowship	2015-08-01	2020-07-31	missing	missing	missing	missing	N	N	missing	missing	missing	missing	missing
92	No	103386/Z/13/Z	Evaluating the efficacy and safety of an innovative and affordable goat lung surfactant for the treatment of respiratory distress syndrome in preterm neonates: a multi-site randomized clinical trial .	All India Institute of Medical Sciences Bhopal	Affordable Healthcare in India Award	2015-08-15	2018-12-09	missing	missing	missing	missing	N	missing	missing	missing	missing	missing	missing
93	No	106856/Z/15/Z	Edible insects as a source of iron	Wageningen UR	Sustaining Health Award	2015-09-01	2020-09-30	NTR7007	The Netherlands National Trial Register (NTR)	2018-01-22	2018-03-30	Y	N	missing	N	missing	Y	N
94	No	106876/Z/15/Z	Pro2Study Intervention study with smoothie based on duckweed (compared to other protein sources)	Wageningen UR	Sustaining Health Award	2015-09-01	2019-03-31	NTR6516	The Netherlands National Trial Register (NTR)	2017-11-01	2017-11-13	Y	Y	missing	N	missing	Y	N
95	No	102567/Z/13/Z	GOLD imaging in acute stroke: further technology development incorporating a perfluorocarbon oxygen carrier (Oxycyte)	Aurum Biosciences Limited	Health Innovation Challenge Fund Award	2015-09-17	2020-04-30	missing	missing	missing	missing	N	N	missing	missing	missing	missing	missing
96	No	106680/Z/14/Z	Parallel Group, Double Blinded, 1:1, Randomized Controlled Phase III Trial of Co-trimoxazole Versus	KEMRI	Africa and Asia Programmes	2015-10-01	2020-10-01	NCT03355664	ClinicalTrials.gov	2018-03-19	2019-11-15	Y	missing	missing	N	missing	N	N
97	No	106680/Z/14/Z	SURE: Short intensive treatment for children with tuberculous meningitis.	KEMRI	Africa and Asia Programmes	2015-10-01	2020-10-01	NCT03587389	ClinicalTrials.gov	2019-03-01	2020-12-31	Y	missing	missing	N	missing	Y	N
98	No	106680/Z/14/Z	A Randomized, Double-blind, Placebo-controlled Trial to Evaluate the Impact of Anthelmintic Treatmen	Viet Nam Major Overseas Programme core grant renewal 2015-2020.	Viet Nam Major Overseas Programme core grant renewal 2015-2020.	2015-10-01	2020-10-01	NCT02597556	ClinicalTrials.gov	2016-02-01	2016-05-31	N	N	missing	N	missing	missing	missing
99	No	106680/Z/14/Z	A randomized double blind placebo controlled trial of adjunctive dexamethasone for the treatment of	Viet Nam Major Overseas Programme core grant renewal 2015-2020.	Viet Nam Major Overseas Programme core grant renewal 2015-2020.	2015-10-01	2020-10-01	NCT03092817	ClinicalTrials.gov	2017-05-25	2020-04-01	N	missing	missing	N	missing	N	N
100	No	106680/Z/14/Z	A pilot phase II randomized controlled double blind trial of 81mg aspirin daily vs. 1000 mg aspirin	Viet Nam Major Overseas Programme core grant renewal 2015-2020.	Viet Nam Major Overseas Programme core grant renewal 2015-2020.	2015-10-01	2020-10-01	NCT02237365	ClinicalTrials.gov	2014-10-17	2016-06-24	N	missing	missing	N	missing	missing	missing
101	No	106698/Z/14/Z	Antibiotics and Activity: An Exploratory Study of Behaviour, Marginalisation, and Knowledge Diffusio	MORU	Thailand Major Overseas Programme core grant renewal 2015-2020.	2015-10-01	2020-09-30	NCT03241316	ClinicalTrials.gov	2017-01-01	2018-05-31	N	N	missing	N	Y	N	N
102	No	106698/Z/14/Z	Safety and immunogenicity evaluation of RTS,S in healthy Thai adults	Thailand Major Overseas Programme core grant renewal 2015-2020.	Thailand Major Overseas Programme core grant renewal 2015-2020.	2015-10-01	2020-09-30	NCT02992119	ClinicalTrials.gov	2017-06-04	2018-02-20	N	N	missing	Y	Y	N	N
103	No	106698/Z/14/Z	Causes and impact of anemia on pregnancy outcome on the Thai-Myanmar Border	Thailand Major Overseas Programme core grant renewal 2015-2020.	Thailand Major Overseas Programme core grant renewal 2015-2020.	2015-10-01	2020-09-30	NCT03174652	ClinicalTrials.gov	2017-07-20	2018-07-20	N	missing	missing	N	Y	N	N
104	No	106698/Z/14/Z	Integrating genetic epidemiology as an intensified surveillance tool in Cambodia	MORU	Africa and Asia Programmes	2015-10-01	2020-09-30	NCT03384472	ClinicalTrials.gov	2016-06-01	2017-02-01	N	missing	missing	N	Y	N	N
105	No	106698/Z/14/Z	Prevalence survey of P. falciparum antimalarial drug resistance markers in India	Thailand Major Overseas Programme core grant renewal 2015-2020.	Thailand Major Overseas Programme core grant renewal 2015-2020.	2015-10-01	2020-09-30	TCTR20171128005	Thai Clinical Trials Registry (TCTR)	2018-01-10	2018-04-01	N	missing	missing	N	missing	N	N
106	No	106698/Z/14/Z	The impact of CRP testing in guiding antibiotic prescription in primary care in low-resource setting	Thailand Major Overseas Programme core grant renewal 2015-2020.	Thailand Major Overseas Programme core grant renewal 2015-2020.	2015-10-01	2020-09-30	NCT02758821	ClinicalTrials.gov	2016-06-08	2017-09-30	N	missing	missing	N	N	missing	missing
107	No	106698/Z/14/Z	Field evaluation of a Point-Of-Care test for bilirubin levels in infants in a low resource settings	Thailand Major Overseas Programme core grant renewal 2015-2020.	Thailand Major Overseas Programme core grant renewal 2015-2020.	2015-10-01	2020-09-30	NCT02926131	ClinicalTrials.gov	2017-01-25	2017-12-11	N	missing	missing	N	N	missing	missing
108	No	106698/Z/14/Z	The population PK of chloroquine for the treatment of non-falciparum malaria in pregnancy	Thailand Major Overseas Programme core grant renewal 2015-2020.	Thailand Major Overseas Programme core grant renewal 2015-2020.	2015-10-01	2020-09-30	NCT01546961	ClinicalTrials.gov	2011-06-01	2016-11-30	N	missing	missing	N	missing	missing	missing
109	No	106698/Z/14/Z	Improving the radical cure of vivax malaria:long vs short primaquine regimens	Thailand Major Overseas Programme core grant renewal 2015-2020.	Thailand Major Overseas Programme core grant renewal 2015-2020.	2015-10-01	2020-09-30	NCT01814683	ClinicalTrials.gov	2014-07-01	2018-02-28	N	missing	missing	N	missing	missing	missing
110	No	106698/Z/14/Z	The natural immune response in pediatric scrub typhus in Chiangrai	Thailand Major Overseas Programme core grant renewal 2015-2020.	Thailand Major Overseas Programme core grant renewal 2015-2020.	2015-10-01	2020-09-30	NCT02398162	ClinicalTrials.gov	2015-07-15	2017-10-17	N	missing	missing	N	missing	missing	missing
111	No	106698/Z/14/Z	Microvascular and metabolic dysregulation in the pathogenesis of severe malaria using metabolomics	Thailand Major Overseas Programme core grant renewal 2015-2020.	Thailand Major Overseas Programme core grant renewal 2015-2020.	2015-10-01	2020-09-30	NCT02451904	ClinicalTrials.gov	2015-06-01	2017-09-30	N	missing	missing	N	missing	missing	missing
112	No	106698/Z/14/Z	A multi-centre, randomised trial to assess the efficacy, safety and tolerability of Triple ACTs	Thailand Major Overseas Programme core grant renewal 2015-2020.	Thailand Major Overseas Programme core grant renewal 2015-2020.	2015-10-01	2020-09-30	NCT02453308	ClinicalTrials.gov	2015-08-01	2018-03-31	N	missing	missing	N	missing	missing	missing
113	No	106698/Z/14/Z	Impact of malaria infection in pregnancy on fetal and newborn growth – child follow-up until 2 years	Thailand Major Overseas Programme core grant renewal 2015-2020.	Thailand Major Overseas Programme core grant renewal 2015-2020.	2015-10-01	2020-09-30	CTRI/2018/02/012047	Clinical Trials Registry - India (CTRI)	2016-09-01	2018-03-31	N	missing	missing	N	missing	missing	missing
114	No	106698/Z/14/Z	A multicentre randomised clinical trial ofthe treatment of scrub typhus in Thailand and Laos	Thailand Major Overseas Programme core grant renewal 2015-2020.	Thailand Major Overseas Programme core grant renewal 2015-2020.	2015-10-01	2020-09-30	ISRCTN47812566	ISRCTN Registry	2003-08-04	2009-12-31	N	missing	missing	N	missing	missing	missing
115	No	106698/Z/14/Z	The Scrub Typhus Antibiotic Resistance Trial (START)	KEMRI	Africa and Asia Programmes	2015-10-01	2020-09-30	NCT03083197	ClinicalTrials.gov	2017-10-15	2019-10-31	Y	Y	missing	N	Undecided	N	N
116	No	106698/Z/14/Z	Micro-epidemiology and elimination strategy of falciparum malaria in areas of artemisinin resistance	Thailand Major Overseas Programme core grant renewal 2015-2020.	Thailand Major Overseas Programme core grant renewal 2015-2020.	2015-10-01	2020-09-30	NCT01872702	ClinicalTrials.gov	2013-04-01	2017-07-31	N	Y	missing	N	missing	missing	missing
117	No	107499/Z/15/Z	A Study to Determine if New Types of Malaria Vaccines Are Safe, Effective and Lead to Immunity in Kenyan Adults	University of Oxford	Strategic Award - Science	2015-11-01	2021-10-31	NCT03947190	ClinicalTrials.gov	2020-05-01	2022-01-31	Y	missing	N	N	Y	N	N
118	No	107499/Z/15/Z	CHMI-SIKA	University of Oxford	Strategic Award - Science	2015-11-01	2021-10-31	NCT02739763	ClinicalTrials.gov	2016-05-01	2020-01-31	Y	Y	N	N	Y	Y	N
119	No	108065/Z/15/Z	Antenatal cotrimoxazole for healthy birth and growth in rural Zimbabwe	Queen Mary University of London	Senior Research Fellowship Clinical	2016-01-01	2023-01-01	missing	missing	missing	missing	Y	N	missing	missing	missing	missing	missing
120	No	108065/Z/15/Z	Sanitation Hygiene Infant Nutrition Efficacy (SHINE) trial	Queen Mary University of London	Senior Research Fellowship Clinical	2016-01-01	2023-01-01	NCT01824940	ClinicalTrials.gov	2012-11-01	2017-07-31	Y	N	missing	N	Y	Y	N
121	No	108065/Z/15/Z	Cotrimoxazole for Mothers to Improve Birth Weight in Infants (COMBI)	Queen Mary University of London	Senior Research Fellowship Clinical	2016-01-01	2023-01-01	missing	missing	missing	missing	Y	Y	missing	missing	missing	missing	missing
122	No	108518/Z/15/Z	A Phase IIa/IIb clinical trial to evaluate the therapeutic efficacy of ChAd63-KH vaccine in patients with persistent post kala-azar dermal leishmaniasis (PKDL).	University of York	Translation Fund	2016-01-01	2021-12-31	missing	missing	missing	missing	N	N	missing	missing	missing	missing	missing
123	No	106946/Z/15/Z	Bioactive Nanofibrous Sutures To Enhance Endogenous Repair Of Rotator Cuff Tears	University of Oxford	Health Innovation Challenge Fund Award	2016-02-01	2024-10-31	missing	missing	missing	missing	N	missing	missing	missing	missing	missing	missing
124	No	110058/Z/15/Z	The NASIMMUNE study	Imperial College London	Intermediate Clinical Fellowship	2016-02-12	2020-02-23	NCT02972957	ClinicalTrials.gov	2017-01-30	2018-12-19	Y	N	N	N	N	N	N
125	No	106871/Z/15/Z	Health Impacts of a Climate Change Adaptation Strategy to Address Drinking-water Salinity in Coastal	International Centre for Diarrhoeal Disease Research	Sustaining Health Award	2016-03-01	2019-11-30	NCT02746003	ClinicalTrials.gov	2016-04-01	2019-04-30	Y	Y	N	Y	N	Y	Y
126	No	107548/Z/15/Z	Bridging the critical policy-practice gap in radical treatment of vivax malaria in Afghanistan	University of Oxford	Research Training Fellowship in Public Health & Tropical Medicine	2016-03-01	2020-02-28	NCT02876549	ClinicalTrials.gov	2016-09-01	2018-12-01	Y	N	N	N	N	Y	Y
127	No	110371/Z/15/Z	Small molecule inhibitors of the anti-apoptotic protein FLIP for the treatmentof cancer.	Queen's University Belfast	Seeding Drug Discovery Award	2016-03-29	2020-12-31	missing	missing	missing	missing	N	missing	missing	missing	missing	missing	missing
128	No	106944/Z/15/Z	Magnetic Resonance Guided Ablation System for Treatment of Ventricular Tachycardia (MR-GAST-VT)	King's College London	Health Innovation Challenge Fund Award	2016-04-01	2022-02-28	missing	missing	missing	missing	N	missing	missing	missing	missing	missing	missing
129	No	110179/Z/15/Z	A Randomized Double Blind Placebo Controlled Trial of Adjunctive Dexamethasone for the Treatment of HIV-infected Adults With Tuberculous Meningitis	University of Oxford	Investigator Award in Science	2016-04-01	2023-04-01	NCT03092817	ClinicalTrials.gov	2017-05-25	2020-04-01	Y	missing	missing	N	Y	N	N
130	No	110179/Z/15/Z	Leukotriene A4 hydrolase Stratified Trial of Adjunctive Corticosteroids for HIV-uninfected adults wi	University of Oxford	Investigator Award in Science	2016-04-01	2023-04-01	NCT03100786	ClinicalTrials.gov	2018-02-08	2021-12-02	Y	Y	N	N	Y	N	N
131	No	201251/Z/16/Z	PREVENT TB: Improving determinants of TB cure, prevention & diagnosis	Imperial College London	Research Training Fellowship	2016-04-15	2020-10-14	ISRCTN17820976	ISRCTN Registry	2012-10-01	2020-10-01	N	missing	missing	N	Stored in repository	Y	Y
132	No	200439/Z/16/Z	A study to determine the safety and tolerability of graded doses of the drug LHF-535 (LHF-535-SDD) in healthy volunteers	Kineta Inc	Translation Fund	2016-04-29	2020-03-31	ACTRN12618001342202	Australian New Zealand Clinical Trials Registry (ANZCTR)	2018-08-07	2019-01-14	N	missing	missing	N	N	N	N
133	No	200439/Z/16/Z	A study to determine the safety and tolerability of graded doses of the drug LHF-535 (LHF-535-SDD) in healthy volunteers, ascending doses	Kineta Inc	Translation Fund	2016-04-29	2020-03-31	NCT03993704	ClinicalTrials.gov	2016-04-29	2019-12-31	N	missing	missing	N	missing	missing	missing
134	No	200121/Z/15/Z	Viability testing and transplantation of marginal livers	University of Birmingham	Health Innovation Challenge Fund Award	2016-06-01	2019-06-01	NCT02740608	ClinicalTrials.gov	2016-10-06	2018-05-08	N	missing	missing	N	N	Y	N
135	No	200134/Z/15/Z	Pre-clinical development of a stem cell based gene therapy protocol and clinical proof of principle for Duchenne Muscular Dystrophy	University of Manchester	Health Innovation Challenge Fund Award	2016-06-01	2022-05-31	missing	missing	missing	missing	N	N	missing	missing	missing	missing	missing
136	No	200181/Z/15/Z	An Open-Label Extension Study to Evaluate the Safety, Tolerability, Pharmacokinetics, and Pharmacodynamics of RO7234292 (ISIS 443139) in Huntington's Disease Patients Who Participated in Prior Investigational Studies of RO7234292 (ISIS 443139)	University College London	Collaborative Award in Science	2016-07-01	2022-06-30	NCT03342053	ClinicalTrials.gov	2017-11-27	2019-10-11	Y	N	N	N	N	N	N
137	No	200181/Z/15/Z	ISIS 443139-CSI AN OPEN-LABEL EXTENSION STUDY TO EVALUATE THE SAFETY, TOLERABILITY, PHARMACOKINETICS AND PHARMACODYNAMICS OF RO7234292 IN HUNTINGTON'S DISEASE PATIENTS WHO PARTICIPATED IN PRIOR INVES…	University College London	Collaborative Award in Science	2016-07-01	2022-06-30	2017-002471-25	EudraCT	2018-10-18	Not listed	Y	Y	missing	N	missing	missing	missing
138	No	201222/Z/16/Z	A Double-Blind Randomised Placebo-Controlled Trial of Vitamin D Supplements for Pregnant Women with Low Levels of Vitamin D in Early Pregnancy	University of Southampton	Research Training Fellowship	2016-08-03	2019-12-31	2007-001716-23	EudraCT	2007-12-03	2018-10-18	N	Y	missing	Y	missing	missing	missing
139	No	200116/Z/15/Z	Randomised controlled trial of early kangaroo mother care for hospitalised neonates <2000g in a low-income country	London School of Hygiene & Tropical Medicine	Research Training Fellowship	2016-08-27	2020-09-27	NCT03555981	ClinicalTrials.gov	2016-08-27	2020-06-30	N	N	missing	N	missing	missing	missing
140	No	200145/Z/15/Z	Next generation engineered T-cell therapy for brain lymphoma	University College London	Health Innovation Challenge Fund Award	2016-09-01	2021-03-30	missing	missing	missing	missing	N	Y	missing	missing	missing	missing	missing
141	No	200901/Z/16/Z	Community-led delivery of HIV self-testing kits in Malawi	London School of Hygiene & Tropical Medicine	Senior Research Fellowship Clinical Renewal	2016-09-01	2021-09-01	NCT03541382	ClinicalTrials.gov	2018-06-01	2019-06-30	Y	N	N	N	Y	Y	N
142	No	201495/Z/16/Z	Identifying Interventions to Prevent and Manage Chronic Kidney Disease	National University of Ireland Galway	Postdoctoral Training Fellowship for Clinicians	2016-09-01	2018-09-01	missing	missing	missing	missing	N	N	missing	missing	missing	missing	missing
143	No	107212/A/15/Z	ITAD (Interleukin-2 Therapy of Autoimmunity in Diabetes)	University of Oxford	Strategic Award - Science	2016-10-01	2022-09-30	NCT03782636	ClinicalTrials.gov	2019-01-01	2021-07-31	Y	N	N	N	Undecided	N	N
144	No	109071/Z/15/A	Stress effects on Brain Connectivity	University of Bristol	PhD Studentship (Basic)	2016-10-01	2019-09-30	missing	missing	missing	missing	N	missing	missing	missing	missing	missing	missing
145	No	202097/Z/16/Z	Mediterranean diet and cognitive decline: using epidemiologic and pilot study data to inform a large-scale intervention.	Queen's University Belfast	Seed Award in Science	2016-10-01	2019-03-31	NCT03569319	ClinicalTrials.gov	2018-05-18	2019-06-30	N	missing	missing	N	Undecided	Y	N
146	No	203077/Z/16/Z	FPCV	KEMRI	Africa and Asia Programmes	2016-10-01	2021-09-30	NCT03489018	ClinicalTrials.gov	2019-03-30	2020-09-30	Y	missing	missing	N	missing	Y	N
147	No	203077/Z/16/Z	A Study of a Vaccine for Pneumonia in Adults and Toddlers in Kenya	University of Oxford	Africa and Asia Programmes	2016-10-01	2021-09-30	NCT02543892	ClinicalTrials.gov	2016-08-10	2018-01-04	N	N	missing	Y	missing	N	N
148	No	203077/Z/16/Z	FLACSAM	University of Oxford	Africa and Asia Programmes	2016-10-01	2021-09-30	NCT02746276	ClinicalTrials.gov	2016-04-01	2016-09-30	N	N	missing	N	Y	missing	missing
149	No	203077/Z/16/Z	YEFE	KEMRI	Africa and Asia Programmes	2016-10-01	2021-09-30	NCT03452475	ClinicalTrials.gov	2018-03-07	2020-02-19	N	missing	missing	N	missing	N	N
150	No	203077/Z/16/Z	NEOFOSFO	KEMRI	Africa and Asia Programmes	2016-10-01	2021-09-30	NCT03453177	ClinicalTrials.gov	2018-03-15	2019-03-14	N	Y	missing	N	Undecided	Y	N
151	No	200450/Z/16/Z	Development of a novel effective and safe intravenous drug for acute cardioversion of atrial fibrillation (AF)	Acesion Pharma	Translation Fund	2016-10-28	2020-07-28	missing	missing	missing	missing	N	missing	missing	missing	missing	missing	missing
152	No	200450/Z/16/Z	A Double-Blind, Randomised, Placebo-Controlled, Parallel-Group Study of AP30663 Given Intravenously for Cardioversion in Patients with Atrial Fibrillation	Acesion Pharma	Translation Fund	2016-10-28	2020-07-28	2018-004445-17	EudraCT	2019-05-30	2020-12-31	N	Y	missing	N	missing	missing	missing
153	No	200796/Z/16/A	Advancing cognitive therapy for anxiety disorders and PTSD	University of Oxford	Investigator Award in Science	2017-01-01	2022-04-02	missing	missing	missing	missing	N	missing	missing	missing	missing	missing	missing
154	No	200796/Z/16/Z	A randomised controlled trial of therapist-assisted online psychological therapies for PTSD	University of Oxford	Principal Research Fellowship Renewal	2017-01-01	2022-04-01	ISRCTN16806208	ISRCTN Registry	2017-01-01	2021-12-31	Y	N	N	N	Y	Y	N
155	No	201486/Z/16/Z	IL-6 Inhibition in Patients with Depression and Low-grade Inflammation: The Insight Study	University of Cambridge	Intermediate Clinical Fellowship	2017-01-01	2021-01-01	ISRCTN16942542	ISRCTN Registry	2017-01-09	2021-05-31	Y	Y	Y	N	Y	Y	Y
156	No	205069/Z/16/Z	Integrating depression management in HIV care in Uganda	MRC/UVRI Uganda Research Unit on AIDS	Senior Research Fellowship in PH&TM	2017-02-02	2022-02-02	ISRCTN86760765	ISRCTN Registry	2017-02-02	2022-02-01	Y	Y	missing	N	Y	Y	N
157	No	106939/Z/15/Z	Repair of Acute Respiratory Distress Syndrome by Stromal Cell Administration (REALIST)	Queen's University Belfast	Health Innovation Challenge Fund Award	2017-03-01	2022-08-01	missing	missing	missing	missing	N	missing	missing	missing	missing	missing	missing
158	No	206523/Z/17/Z	Clinical Study of Immunity Duration of Yellow Fever Vaccine in Military	Oswaldo Cruz Foundation	Vaccines	2017-03-27	2018-05-31	NCT03338231	ClinicalTrials.gov	2017-03-27	2017-09-04	N	missing	missing	N	N	N	N
159	No	106878/B/15/Z	First-in-human trail of an optimised lentiviral vector for cystic fibrosis gene therapy	University of Oxford	Health Innovation Challenge Fund Award	2017-04-01	2022-12-31	missing	missing	missing	missing	N	N	missing	missing	missing	missing	missing
160	No	106878/C/15/Z	First-in-human trail of an optimised lentiviral vector for cystic fibrosis gene therapy	Imperial College London	Health Innovation Challenge Fund Award	2017-04-01	2022-12-31	missing	missing	missing	missing	N	missing	missing	missing	missing	missing	missing
161	No	106878/Z/15/Z	First-in-human trial of an optimised lentiviral vector for cystic fibrosis gene therapy	University of Edinburgh	Health Innovation Challenge Fund Award	2017-04-01	2022-12-31	Not started yet	n/a	n/a	n/a	N	missing	missing	missing	missing	missing	missing
162	No	106919/A/15/Z	PRIDE (PRemIum for aDolEscents).	Harvard University	Principal Research Fellowship (New)	2017-04-01	2020-10-01	NCT03633916	ClinicalTrials.gov	2018-08-20	2018-12-15	Y	Y	N	N	N	N	N
163	No	207813/Z/17/Z	KAE609 Malaria Review	Novartis Pharma AG	Translation Fund	2017-04-01	2020-12-31	missing	missing	missing	missing	N	missing	missing	missing	missing	missing	missing
164	No	203581/Z/16/Z	Defining the Immune Response to Nasopharyngeal Colonisation by the Commensal Neisseria Lactamica (Lac-7)	University of Southampton	Research Training Fellowship	2017-05-01	2020-05-01	NCT03633474	ClinicalTrials.gov	2018-09-01	2019-09-01	N	N	missing	N	Undecided	N	N
165	No	205256/Z/16/Z	Novel inhibitors of MAP4K4 (HGK), an acute therapy to prevent cardiac muscle cell death following myocardial infarction	Imperial College London	Seeding Drug Discovery Award	2017-05-01	2020-01-31	missing	missing	missing	missing	N	missing	missing	missing	missing	missing	missing
166	No	206001/Z/16/Z	Mitochondrial DNA disorders: Is there a way to prevent transmission?	Newcastle University	Discretionary Award – Science	2017-05-01	2022-05-01	Pending publication by registry	ClinicalTrials.gov	missing	missing	Y	N	N	N	N	n/a	n/a
167	No	200871/Z/16/Z	A new biology of clinical outcome in immune-mediated disease	University of Cambridge	Investigator Award in Science	2017-06-01	2022-06-01	Not started yet	n/a	n/a	n/a	Y	n/a	n/a	n/a	n/a	n/a	n/a
168	No	203493/Z/16/Z	Beating the drum – unique acoustically optimised silk fibroin blended bio-membranes for treatment of chronic middle ear diseases.	Ear Science Institute Australia	Translation Fund	2017-06-26	2022-03-31	missing	missing	missing	missing	N	missing	missing	missing	missing	missing	missing
169	No	203151/Z/16/Z	Cambridge Stem Cell Institute	University of Cambridge	Wellcome Trust Centre	2017-07-01	2022-07-01	missing	missing	missing	missing	N	missing	missing	missing	missing	missing	missing
170	No	205228/Z/16/Z	Understanding cross-reactive immunity to Japanese encephalitis virus	University of Liverpool	Clinical Research Career Development Fellowship	2017-07-01	2020-01-01	missing	missing	missing	missing	N	missing	missing	missing	missing	missing	missing
171	No	206331/Z/17/Z	TB043: Investigating immune responses to aerosol BCG challenge in healthy UK adults	University of Oxford	Investigator Award in Science	2017-07-01	2022-07-01	NCT03912207	ClinicalTrials.gov	2019-03-01	2020-12-31	Y	N	N	N	N	Y	N
172	No	206417/Z/17/Z	SNEHA-TARA pragmatic cluster randomised controlled trial	University College London	Senior Research Fellowship Clinical Renewal	2017-07-01	2022-07-01	ISRCTN84502355	ISRCTN Registry	2017-07-01	2022-06-30	Y	N	N	N	Y	Y	Y
173	No	206417/Z/17/Z	Community interventions to prevent violence against women and girls in informal settlements in Mumbai: the SNEHA-TARA trial	University College London	Senior Research Fellowship Clinical Renewal	2017-07-01	2022-07-01	CTRI/2018/02/012047	Clinical Trials Registry - India (CTRI)	2018-03-05	Not listed	Y	Y	N	N	Y	Y	N
174	No	205222/Z/16/Z	Revitalising Informal Settlements and their Environments (RISE): Assessing health, social, and environmental outcomes following water-sensitive revitalisation of informal settlements in Indonesia and Fiji	Monash University	Our Planet, Our Health (Full)	2017-07-11	2022-07-11	ACTRN12618000633280	Australian New Zealand Clinical Trials Registry (ANZCTR)	2018-04-26	2022-08-01	Y	N	N	N	Y	Y	Y
175	No	206589/Z/17/Z	Reducing risk of recurrent stroke and cognitive decline after TIA and stroke through characterisation and treatment of novel physiological markers	University of Oxford	Clinical Research Career Development Fellowship	2017-08-01	2021-08-01	missing	missing	missing	missing	N	missing	missing	missing	missing	missing	missing
176	No	206602/Z/17/Z	Public health data science to investigate and improve migrant health.	University College London	Clinical Research Career Development Fellowship	2017-08-01	2022-10-01	missing	missing	missing	missing	N	N	missing	missing	missing	missing	missing
177	No	206575/Z/17/Z	A pragmatic randomised study to optimise screening, prevention and care for tuberculosis in Malawi (PROSPeCT Study)	Liverpool School of Tropical Medicine	Clinical Research Career Development Fellowship	2017-08-07	2022-08-07	NCT03519425	ClinicalTrials.gov	2018-08-01	2019-12-31	Y	Y	Y	N	Y	Y	N
178	No	205291/Z/16/Z	Development of selective Adrenomedullin-2 receptor antagonists for treatment of pancreatic cancer	University of Sheffield	Seeding Drug Discovery Award	2017-09-01	2020-01-31	missing	missing	missing	missing	N	missing	missing	missing	missing	missing	missing
179	No	206275/Z/17/Z	STRONGER SAFE: PHASE 3 - CLUSTER-RANDOMISED TRIAL OF DOUBLE-DOSE ORAL AZITHROMYCIN (A) COMBINED WITH	London School of Hygiene & Tropical Medicine	Collaborative Award in Science	2017-09-01	2022-09-01	NCT03813069	ClinicalTrials.gov	2019-01-10	2019-06-30	Y	missing	Y	N	Y	N	N
180	No	207504/Z/17/Z	Role of ATP in Chronic Cough	Imperial College London	Investigator Award in Science	2017-09-01	2022-08-31	missing	missing	missing	missing	N	missing	missing	missing	missing	missing	missing
181	No	210772/Z/18/Z	Improving diagnosis and treatment of TB meningitis	London School of Hygiene & Tropical Medicine	PhD Training Fellowship for Clinicians	2017-09-01	2020-08-31	missing	missing	missing	missing	N	missing	missing	missing	missing	missing	missing
182	No	211166/Z/18/Z	Co-evolution of tumour mutational and CD4 T-cell differentiation landscapes	University College London	PhD Training Fellowship for Clinicians	2017-09-04	2020-09-03	missing	missing	missing	missing	N	missing	missing	missing	missing	missing	missing
183	No	203764/Z/16/A	Immune responses of initially naïve human hosts to repeated infection with blood-stage Plasmodium vivax.	University of Edinburgh	PhD Studentship (Basic)	2017-10-01	2020-09-30	missing	missing	missing	missing	N	Y	missing	missing	missing	missing	missing
184	No	203853/Z/17/A	High dose iminosugar treatment: Investigation of a new antiviral mechanism of action	University of Oxford	PhD Studentship (Basic)	2017-10-01	2020-09-30	missing	missing	missing	missing	N	missing	missing	missing	missing	missing	missing
185	No	203966/Z/16/A	Therapeutic manipulation of the stromal compartment in colorectal cancer	University of Oxford	PhD Studentship (Basic)	2017-10-01	2020-09-30	missing	missing	missing	missing	N	missing	missing	missing	missing	missing	missing
186	No	204998/Z/16/Z	Transforming the screening, diagnosis and treatment of prostate cancer	Imperial College London	Senior Research Fellowship Clinical	2017-10-01	2022-09-30	missing	missing	missing	missing	N	N	missing	missing	missing	missing	missing
187	No	205981/Z/17/Z	Development of a High Efficacy Vaccine against P. falciparum Malaria	University of Oxford	Translation Fund	2017-10-01	2023-04-30	NCT02905019	ClinicalTrials.gov	2016-08-01	2017-12-21	N	Y	missing	N	Undecided	N	N
188	No	206316/Z/17/Z	Community based interventions to improve HIV outcomes in adolescents: a cluster randomised trial in Zimbabwe	London School of Hygiene & Tropical Medicine	Senior Research Fellowship Clinical	2017-10-01	2022-10-01	NCT 03719521	ClinicalTrials.gov	2019-01-01	2022-09-30	Y	N	N	N	Y	N	N
189	No	211022/Z/18/Z	Social anxiety in adolescents: Testing aspects of the cognitive model and developing an Internet version of Cognitive Therapy.	University of Oxford	PhD Training Fellowship for Clinicians	2017-10-01	2020-09-30	missing	missing	missing	missing	N	missing	missing	missing	missing	missing	missing
190	No	211025/Z/18/Z	Dissociation: Developing a Cognitive Maintenance Model and Psychological Intervention	University of Oxford	PhD Training Fellowship for Clinicians	2017-10-02	2020-10-01	missing	missing	missing	missing	N	missing	missing	missing	missing	missing	missing
191	No	210793/Z/18/Z	Developing and piloting an interventional bundle to reduce mortality from gastroschisis in low-resource settings and identifying priority congenital anomalies for further interventional studies.	London School of Hygiene & Tropical Medicine	PhD Training Fellowship for Clinicians	2017-10-04	2020-10-03	missing	missing	missing	missing	N	missing	missing	missing	missing	missing	missing
192	No	206498/Z/17/Z	Optical Characterisation of Epithelial Tissue Function and Metabolism for Early Cancer Diagnosis and Treatment Monitoring	University of Surrey	Career Re-Entry Fellowship	2017-10-06	2021-10-06	missing	missing	missing	missing	N	missing	missing	missing	missing	missing	missing
193	No	207457/Z/17/Z	Analgesic efficacy and safety of fentanyl in infants	University of Oxford	Senior Research Fellowship Basic	2017-12-01	2022-12-01	Not started yet	n/a	2020-01-01	n/a	Y	n/a	n/a	n/a	n/a	n/a	n/a
194	No	200448/Z/16/Z	Personalised Therapy in Crohn's Disease	PredictImmune Ltd	Translation Fund	2017-12-11	2022-12-31	missing	missing	missing	missing	N	missing	missing	missing	missing	missing	missing
195	No	206853/Z/17/Z	Cigarette pack size and consumption: a parallel group randomised controlled trial	University of Cambridge	Collaborative Award in Science	2018-01-02	2022-01-02	ISRCTN34202533	ISRCTN Registry	2018-02-01	2019-01-21	Y	Y	Y	N	Y	Y	Y
196	No	207504/B/17/Z	Are there differences in central nervous system processing in patients with refractory chronic cough	University of Manchester	Investigator Award in Science	2018-01-08	2023-01-08	ISRCTN88737146	ISRCTN Registry	2017-02-28	2022-01-07	Y	missing	N	N	To be made available at a later date	Y	N
197	No	207504/B/17/Z	Cough Central: central nervous system in chronic cough	University of Manchester	Investigator Award in Science	2018-01-08	2023-01-08	missing	missing	missing	missing	N	missing	missing	missing	missing	missing	missing
198	No	206296/Z/17/Z	VIETNARMS - Multiple arm Hepatitis C treatment in Vietnam	Imperial College London	Collaborative Award in Science	2018-03-01	2023-03-01	ISRCTN61522291	ISRCTN Registry	2018-11-01	2023-12-31	Y	missing	N	N	Y	Y	N
199	No	208872/Z/17/Z	A personalized medicine approach for beta-thalassemia patients: testing sirolimus in a first pilot clinical trial (sirthalaclin)	Rare Partners	Innovator Award	2018-03-01	2022-02-28	Not started yet	n/a	n/a	n/a	N	missing	missing	missing	missing	missing	missing
200	No	211475/Z/18/Z	Manufacturing and clinical development of a 4-valent bioconjugate Shigella vaccine	GlaxoSmithKline Biologicals SA	Innovations Project Award	2018-03-04	2021-03-03	missing	missing	missing	missing	N	missing	missing	missing	missing	missing	missing
201	No	208870/Z/17/Z	The Women-2 Trial -Tranexamic acid for preventing postpartum haemorrhage	London School of Hygiene & Tropical Medicine	Innovations Project Award	2018-03-21	2022-09-30	missing	missing	missing	missing	N	missing	missing	missing	missing	missing	missing
202	No	207522/Z/17/Z	Can a system intervention employing team-based case review help improve quality and safety of paediatric hospital care in Kenya?	University of Oxford	Senior Research Fellowship Clinical Renewal	2018-04-01	2023-04-01	missing	missing	missing	missing	N	missing	missing	missing	missing	missing	missing
203	No	208925/Z/17/Z	Prevention of Gestational Diabetes in Obese Pregnant Women; a Proof of Principle Study Targeting Early Pregnancy Intervention to Women at Risk.	King's College London	Seed Award in Science	2018-04-01	2021-10-01	missing	missing	missing	missing	N	missing	missing	missing	missing	missing	missing
204	No	209492/Z/17/Z	AKR1C3 as a mediator of metabolic risk in polycystic ovary syndrome with androgen excess phenotype	University of Birmingham	Investigator Award in Science	2018-04-01	2023-04-01	Not started yet	n/a	2021-01-01	n/a	N	missing	missing	missing	missing	missing	missing
205	No	208970/Z/17/Z	KarXT: A potential novel mechanism antipsychotic and procognitive therapeutic	Karuna Pharmaceuticals Inc	Innovations Project Award	2018-04-13	2020-04-11	NCT03697252	ClinicalTrials.gov	2018-09-18	2019-09-04	Y	Y	missing	N	N	N	N
206	Yes	207472/Z/17/Z	RCT of Natamycin vs. Chlorhexidine for the treatment of Fungal Keratitis	London School of Hygiene & Tropical Medicine	Senior Research Fellowship Clinical Renewal	2018-05-01	2023-05-01	ISRCTN14332621	ISRCTN Registry	2019-06-01	2019-12-31	Y	N	N	N	Y	Y	N
207	Yes	215695/Z/19/Z	Paediatric Rapid Sepsis Trigger (PRST) Tool	University of British Columbia	Innovator Award: Digital Technologies	2018-05-01	2020-04-30	NCT04304235	ClinicalTrials.gov	2020-03-01	2021-12-31	N	missing	missing	N	Y	N	N
208	Yes	212399/Z/18/Z	Clinical development of a Novel, Live, Attenuated Oral Combination Shigella/ETEC Vaccine	EveliQure Biotechnologies GmbH	Innovator Award	2018-06-04	2020-06-03	missing	missing	missing	missing	N	missing	missing	missing	missing	missing	missing
209	Yes	210735/A/18/Z	The Pelotas Trial of Parenting Interventions for Aggression (The PIÁ Trial)	ABRASCO	Investigator Award in Science	2018-07-15	2025-07-15	RBR-2kwfsk	Brazilian Clinical Trials Registry (ReBec)	2018-06-18	Not listed	Y	missing	N	N	Y	Y	N
210	Yes	210755/Z/18/Z	Disorders of Thyroid Hormone Action: Diagnosis, Pathophysiology and Therapy	University of Cambridge	Investigator Award in Science	2018-08-01	2023-08-01	missing	missing	missing	missing	N	missing	missing	missing	missing	missing	missing
211	Yes	203481/Z/16/Z	MENSA - An innovative antimalarial treatment – Proof of Efficacy in Malaria Human Challenge Model	Merck KGaA	Translation Fund	2018-08-18	2019-08-30	NCT03261401	ClinicalTrials.gov	2017-09-15	2019-06-14	N	N	missing	N	missing	N	N
212	Yes	209943/Z/17/Z	Interaction Between Omeprazole and Gliclazide in CYP2C19 Normal/ Ultrarapid Metabolisers (INTERGLIKOM)	Faculty of Pharmacy University of Sarajevo	Seed Award in Science	2018-09-07	2020-09-07	NCT04198948	ClinicalTrials.gov	2019-03-04	2019-08-05	N	missing	missing	N	missing	N	N
213	Yes	209198/Z/17/Z	Forearm Immobilization, Metabolic Health, and Muscle Loss	University of Exeter	Sir Henry Wellcome Postdoctoral Fellowship	2018-10-01	2022-10-01	NCT03866512	ClinicalTrials.gov	2019-05-10	2021-01-31	N	missing	missing	N	N	Y	N
214	Yes	216346/Z/19/Z	Tracking tumour evolution through adjuvant therapy in triple negative breast cancer	Institute of Cancer Research	PhD Training Fellowship for Clinicians	2018-10-01	2021-09-30	missing	missing	missing	missing	N	missing	missing	missing	missing	missing	missing
215	Yes	216421/Z/19/Z	Point-of-care viral load testing to enhance primary care HIV services in South Africa	University of Oxford	PhD Training Fellowship for Clinicians	2018-10-01	2021-10-01	PACTR202002785960123	Pan African Clinical Trial Registry	not started yet	missing	N	N	missing	missing	missing	missing	missing
216	Yes	216421/Z/19/Z	Point-of-care viral load testing to enhance primary care HIV services in South Africa	University of Oxford	PhD Training Fellowship for Clinicians	2018-10-01	2021-10-01	PACTR202001785886049	Pan African Clinical Trial Registry	not started yet	missing	N	missing	missing	missing	missing	missing	missing
217	Yes	212336/Z/18/Z	Vivax Malaria Human Infection Studies in Thailand	University of Oxford	Controlled Human Infection Models	2018-11-01	2023-11-01	NCT04083508	ClinicalTrials.gov	2020-08-01	2021-11-30	N	Y	missing	N	Y	N	N
218	Yes	210479/Z/18/Z	Using social networks to understand and intervene on HIV epidemic spread	University College London	Sir Henry Dale Fellowship	2019-01-01	2024-01-01	Not started yet	n/a	n/a	n/a	Y	N	n/a	n/a	n/a	n/a	n/a
219	Yes	210572/Z/18/Z	Deciphering AMD by Deep Phenotyping and Machine Learning- Prospective Study - PINNACLE (PINNACLE)	University of Southampton	Collaborative Award in Science	2019-01-01	2024-01-01	NCT04269304	ClinicalTrials.gov	2019-10-28	2023-12-31	Y	missing	missing	N	Y	Y	Y
220	Yes	211433/Z/18/Z	Malawi Accelerated Research in Vaccines, Experimental and Laboratory Systems	Liverpool School of Tropical Medicine	Controlled Human Infection Models	2019-01-01	2024-01-01	Not started yet	n/a	n/a	n/a	N	missing	missing	missing	missing	missing	missing
221	Yes	212265/Z/18/Z	Tenofovir/Lamivudine/Dolutegravir Combination as Second Line ART: a Randomised Controlled Trial (ARTIST)	University of Cape Town	Investigator Award in Science	2019-01-02	2022-01-02	NCT03991013	ClinicalTrials.gov	2019-07-01	2020-12-31	Y	missing	missing	N	Y	N	N
222	Yes	217652/Z/19/Z	Identifying mediators in patients with hidradenitis supportive	University College Dublin	PhD Training Fellowship for Clinicians	2019-01-07	2022-01-06	2016-001566-28	EudraCT	2017-01-11	ongoing	N	missing	missing	N	missing	N	N
223	Yes	212346/Z/18/Z	21st Century Treatments for Sustainable Elimination of Leishmasiasis	Drugs for Neglected Diseases Initiative	Innovations Project Award	2019-01-25	2022-01-24	Not started yet	n/a	n/a	n/a	N	missing	missing	missing	missing	missing	missing
224	Yes	206035/Z/17/Z	Clinical Validation of Optical Molecular Alveoscopy for the Immediate Bed-Side Diagnosis of Pneumonia in the Intensive Care Unit	University of Edinburgh	Translation Fund	2019-01-31	2023-01-30	Not started yet	n/a	n/a	n/a	N	missing	missing	missing	missing	missing	missing
225	Yes	215727/Z/19/Z	GlycoShig3: age-descending phase 2a study into target population with the SF2a-TT15 synthetic carbohydrate-based vaccine	Institut Pasteur	Innovations Priority Project	2019-03-29	2022-03-28	Not started yet	n/a	n/a	n/a	N	missing	missing	missing	missing	missing	missing
226	Yes	211100/Z/18/Z	PET imaging of Inflammation and Lipid Lowering (PIILL)	University of Cambridge	Clinical Research Career Development Fellowship	2019-04-01	2024-04-01	NCT04073797	ClinicalTrials.gov	2019-10-01	2023-10-01	N	N	missing	N	N	Y	N
227	Yes	211100/Z/18/Z	Residual Inflammation and Plaque Progression Long-Term Evaluation (RIPPLE)	University of Cambridge	Clinical Research Career Development Fellowship	2019-04-01	2024-04-01	NCT04073810	ClinicalTrials.gov	2019-10-01	2023-10-01	N	missing	missing	N	N	Y	N
228	Yes	211100/Z/18/Z	PET Imaging of Giant Cell and Takayasu Arteritis (PITA)	University of Cambridge	Clinical Research Career Development Fellowship	2019-04-01	2024-04-01	NCT04071691	ClinicalTrials.gov	2019-06-25	2023-08-31	N	Y	missing	N	N	Y	N
229	Yes	212345/Z/18/Z	Establishing a Dengue Controlled Human Infection Model in Viet Nam	University of Oxford	Controlled Human Infection Models	2019-04-01	2022-04-01	Not started yet	n/a	n/a	n/a	N	missing	missing	missing	missing	missing	missing
230	Yes	215688/Z/19/Z	Multi-dimensional Diagnostics for Rapid Detection of Infectious Diseases in Developing Countries	Imperial College London	Innovator Award	2019-04-01	2022-03-31	Not started yet	n/a	n/a	n/a	N	missing	missing	missing	missing	missing	missing
231	Yes	214554/Z/18/Z	The development and feasibility trial of a complex intervention to improve AccesS to living-donor Kidney transplantation: the ASK trial	University of Bristol	Clinical Research Career Development Fellowship	2019-04-15	2023-04-15	Not started yet	n/a	n/a	n/a	N	missing	missing	missing	missing	missing	missing
232	Yes	214207/Z/18/Z	Evaluating the impact of a Lao language mobile phone antimicrobial use guideline application on antimicrobial prescribing in Laos	University of Oxford	International Training Fellowship - Full	2019-05-01	2022-05-01	Not started yet	n/a	n/a	n/a	N	missing	missing	missing	missing	missing	missing
233	Yes	215474/Z/19/Z	Duration of immunity 10 years after a yellow fever vaccine dose-response study – a complementary study	Oswaldo Cruz Foundation	DFID-Wellcome Epidemic Preparedness Grant	2019-05-01	2020-08-01	Pending publication by registry	ClinicalTrials.gov	missing	missing	N	missing	missing	missing	missing	missing	missing
234	Yes	215633/Z/19/Z	The Peek Practice-based Evidence Framework	London School of Hygiene & Tropical Medicine	Collaborative Award in Science	2019-05-01	2024-04-30	Not started yet	n/a	n/a	n/a	N	missing	missing	missing	missing	missing	missing
235	Yes	215691/Z/19/Z	Randomized controlled trial of interventions for treatment of shock in children with severe acute malnutrition and cholera or other dehydrating diarrheas	International Centre for Diarrhoeal Disease Research	DFID-Wellcome Epidemic Preparedness Grant	2019-05-04	2021-05-03	Not started yet	n/a	n/a	n/a	N	N	missing	missing	missing	missing	missing
236	Yes	216044/Z/19/Z	Controlled Infection for Testing Efficacy of Hookworm Vaccines in Brazil	Fundação de Desenvolvimento da Pesquisa	Human Infection Studies (Full)	2019-05-09	2019-11-09	Not started yet	n/a	n/a	2025-01-31	N	Y	missing	N	missing	missing	missing
237	Yes	212210/Z/18/Z	Typhoid infection model in India	Translational Health Science and Technology Institute	Controlled Human Infection Models	2019-05-10	2023-05-10	Not started yet	n/a	n/a	n/a	N	missing	missing	missing	missing	missing	missing
238	Yes	214321/Z/18/Z	Evaluation of novel therapeutic strategies to accelerate bacterial clearance and host recovery in disseminated HIV-associated tuberculosis	University of Cape Town	Senior Research Fellowship	2019-06-01	2024-06-01	Not started yet	n/a	n/a	n/a	N	missing	missing	missing	missing	missing	missing
239	Yes	214374/Z/18/Z	Gonococcal vaccine initiative	University of Oxford	Collaborative Award in Science	2019-06-01	2023-06-01	Not started yet	n/a	n/a	n/a	N	missing	missing	missing	missing	missing	missing
240	Yes	215898/Z/19/Z	Study to Evaluate the Safety, Tolerability and Immunogenicity of a Potential Enteric Fever Vaccine	Prokarium	Innovations Project Award	2019-06-01	2022-09-30	NCT04349553	ClinicalTrials.gov	2019-12-16	2020-05-08	N	missing	missing	N	N	N	N
241	Yes	217692/Z/19/Z	Study to Assess Safety, Tolerability and Phamacokinetics of KAE609 Administered Intravenously in Healthy Subjects	Novartis Pharma AG	Innovations Priority Project	2019-06-01	2023-05-31	NCT04321252	ClinicalTrials.gov	2020-07-15	2020-11-11	N	missing	missing	N	N	Y	Y
242	Yes	209265/Z/17/Z	Evaluating the combined use of non-invasive respiratory support alongside preventative anticonvulsant treatment in children presenting to hospital with cerebral malaria and convulsions	Imperial College London	Collaborative Award in Science	2019-06-30	2023-06-30	ISRCTN76942974	ISRCTN Registry	2018-02-01	2021-06-30	Y	N	missing	N	Y	Y	N
243	Yes	212176/Z/18/Z	Malaria exposure, emergency care and severe disease phenotypes in African children	University of Oxford	Principal Research Fellowship Renewal	2019-07-01	2024-07-01	Not started yet	n/a	n/a	n/a	N	missing	missing	missing	missing	missing	missing
244	Yes	215492/Z/19/Z	SUNRISE cluster RCT: Scaling Up Nurturing care, a Radio Intervention to Stimulate Early child development in Burkina Faso	London School of Hygiene & Tropical Medicine	Collaborative Award in Science	2019-07-01	2024-06-30	missing	missing	missing	missing	N	missing	missing	missing	missing	missing	missing
245	Yes	215843/Z/19/Z	LAMP – REP: Learn, Assess, Manage, Prevent for Relapse in Early Psychosis	Beth Israel Deaconess Medical Centre	Innovator Award: Digital Technologies	2019-07-01	2021-06-30	Not started yet	n/a	n/a	n/a	N	missing	missing	missing	missing	missing	missing
246	Yes	216060/Z/19/Z	The Cannabidiol Early Psychosis Project: A Randomised Controlled Trial	University of Melbourne	Innovations Project Award	2019-07-01	2023-06-30	Not started yet	n/a	n/a	n/a	N	missing	missing	missing	missing	missing	missing
247	Yes	209589/Z/17/Z	Examining physiological hypoxia at menstruation to define the mechanisms that underpin endometrial resilience and heavy menstrual bleeding	University of Edinburgh	Clinical Research Career Development Fellowship	2019-08-01	2025-06-30	missing	missing	missing	missing	N	missing	missing	missing	missing	missing	missing
248	Yes	215908/Z/19/Z	Diagnostics of Joints Using Magic Angle Directional Imaging	Imperial College London	Innovator Award	2019-08-01	2022-08-01	Not started yet	n/a	n/a	n/a	N	missing	missing	missing	missing	missing	missing
249	Yes	218238/Z/19/Z	GMMA-based Shigella vaccine serology and schedule finding trial	GlaxoSmithKline Biologicals SA	Innovations Priority Project	2019-09-01	2022-08-31	missing	missing	missing	missing	N	missing	missing	missing	missing	missing	missing
250	Yes	218443/Z/19/Z	Development of a Rapidly Active Live-attenuated Cholera Vaccine	Brigham & Women's Hospital	Innovations Priority Project	2019-09-01	2021-12-31	Not started yet	n/a	n/a	n/a	N	N	missing	missing	missing	missing	missing
251	Yes	215674/Z/19/Z	Evidence Based Targeted Water, Sanitation, and Hygiene Interventions to Reduce Cholera in Hotspots in the Democratic Republic of the Congo	Johns Hopkins Bloomberg School of Public Health	DFID-Wellcome Epidemic Preparedness – Cholera Grant	2019-10-01	2021-10-01	Not started yet	n/a	n/a	n/a	N	missing	missing	missing	missing	missing	missing
252	Yes	216005/Z/19/Z	STEP - Stratification and Treatment in Early Psychosis	King's College London	Innovations Project Award	2019-10-01	2024-09-30	Not started yet	n/a	n/a	n/a	N	missing	missing	missing	missing	missing	missing
253	Yes	218528/Z/19/Z	Establishing Shigella Human Infection Studies in an endemic population in Kenya for evaluating Shigella vaccines	University of Oxford	Human Infection Studies (Full)	2019-10-01	2024-09-30	Not started yet	n/a	n/a	n/a	N	missing	missing	missing	missing	missing	missing
254	Yes	219425/Z/19/Z	Scaling-up Health-Arts Programmes: Implementation and Effectiveness Research (SHAPER)	King's College London	Discretionary Award – C&S	2019-10-01	2022-09-30	Not started yet	n/a	n/a	n/a	N	N	missing	missing	missing	missing	missing
255	Yes	216458/Z/19/Z	Creating demand for Fishermen’s Schistosomiasis and HIV services (FISH): piloting and delivery of a 3-arm cluster randomised control trial (cRCT) in Malawi	Liverpool School of Tropical Medicine	International Intermediate Fellowship	2019-11-01	2024-11-01	Not started yet	n/a	n/a	n/a	N	missing	missing	missing	missing	missing	missing
256	Yes	218454/Z/19/Z	Human infection studies for Schistosoma mansoni vaccine testing in Uganda	London School of Hygiene & Tropical Medicine	Human Infection Studies (Full)	2019-11-01	2024-10-31	Not started yet	n/a	n/a	n/a	N	missing	missing	missing	missing	missing	missing
257	Yes	218460/Z/19/Z	Cholera infection model in India	Christian Medical College, Vellore	Human Infection Studies (Full)	2019-11-01	2024-04-30	missing	missing	missing	missing	N	N	missing	missing	missing	missing	missing
258	Yes	215471/Z/19/Z	Optimising AVATAR therapy for distressing voices: a multi-centre randomised controlled trial	King's College London	Innovations Project Award	2019-12-01	2023-07-31	Not started yet	n/a	n/a	n/a	N	missing	missing	missing	missing	missing	missing
259	Yes	215619/Z/19/Z	Deep conditioning using CRISPR edited T cells	University College London	Collaborative Award in Science	2019-12-01	2023-12-01	Not started yet	n/a	n/a	n/a	N	missing	missing	missing	missing	missing	missing
260	Yes	219775/Z/19/Z	A Trial to Assess the Safety, Immunogenicity and Efficacy of a Trivalent Rotavirus P2-VP8 Subunit Vaccine in Prevention of Severe Rotavirus Gastroenteritis in Healthy Infants in Africa and India	Amsterdam Institute for Global Health and Development	Impact of vaccines on antimicrobial resistance	2019-12-15	2022-12-14	NCT04010448	ClinicalTrials.gov	2019-10-10	2024-08-15	N	Y	Y	N	Y	Y	N
261	Yes	215524/Z/19/Z	Pregnancy outcome prediction study 2	University of Cambridge	Investigator Award in Science	2020-01-01	2025-07-01	ISRCTN12181427	ISRCTN Registry	2018-05-10	2025-06-01	N	missing	missing	N	Y	Y	N
262	Yes	215983/Z/19/Z	Next Generation T-cell therapies for CMV post-allogeneic stem cell transplant	University College London	Innovator Award	2020-01-01	2021-12-31	Not started yet	n/a	n/a	n/a	N	missing	missing	missing	missing	missing	missing
263	Yes	219639/Z/19/Z	Innovative therapeutics for Chagas disease and Cryptosporidiosis	Novartis Institute for BioMedical Research	Innovations HIT NTD Flagship	2020-01-01	2023-12-31	missing	missing	missing	missing	N	missing	missing	missing	missing	missing	missing
264	Yes	219666/Z/19/Z	Human monoclonal antibodies against Shigella (ShiMabs), for therapy and vaccine acceleration	Fondazione Toscana Life Sciences	Innovations AIGH Enterics Flagship	2020-01-01	2022-12-31	Not started yet	n/a	n/a	n/a	N	Y	missing	missing	missing	missing	missing
265	Yes	218463/Z/19/Z	Controlled Infection for Testing Efficacy of Hookworm Vaccines in Brazil	Fundação de Desenvolvimento da Pesquisa	Human Infection Studies (Full)	2020-02-01	2025-02-01	Not started yet	n/a	n/a	n/a	N	N	missing	missing	missing	missing	missing
266	Yes	219620/Z/19/Z	Small Molecule Antidote to Snakebite	Ophirex	Discretionary Award - Snakebite	2020-02-03	2020-07-03	missing	missing	missing	missing	N	N	missing	missing	missing	missing	missing
267	Yes	216447/Z/19/Z	Chicken liver and eggshell crackers as a safe and affordable animal-source food for overcoming micronutrient deficits during pregnancy and lactation in Indonesia: a double-blind randomised controlled trial	SEAMEO RECFON	International Training Fellowship	2020-02-20	2023-02-20	Not started yet	n/a	n/a	n/a	N	missing	missing	missing	missing	missing	missing
268	Yes	220764/Z/20/Z	Detecting and Excluding Coronavirus disease 2019 (COVID-19) at the Point of Need	Mologic Ltd	Coronavirus	2020-02-28	2021-02-27	missing	missing	missing	missing	N	missing	missing	missing	missing	missing	missing
269	Yes	220125/Z/20/Z	Detecting Ebola at the Last Mile	Institut Pasteur de Dakar	DFID-Wellcome Epidemic Preparedness Grant	2020-03-01	2020-11-01	missing	missing	missing	missing	N	missing	missing	missing	missing	missing	missing
270	Yes	202749/Z/16/C	Dual-Acting Aspartyl Protease Antimalarials	Merck Sharp & Dohme	Innovations Priority Project	2020-03-18	2022-03-17	missing	missing	missing	missing	N	missing	missing	missing	missing	missing	missing
271	Yes	218380/Z/19/Z	Navigation to improve outcome of epilepsy surgery	University College London	Innovator Award	2020-04-01	2023-03-31	Not started yet	n/a	n/a	n/a	N	Y	missing	missing	missing	missing	missing
272	Yes	219417/Z/19/Z	Understanding and disrupting the link between obesity and metabolic disease	University of Cambridge	Senior Research Fellowship Renewal	2020-10-01	2025-09-30	Not started yet	n/a	n/a	n/a	N	missing	missing	missing	missing	missing	missing
								missing

## Sheet: Data dictionary
Variable	Definition
Required to comply with May18 policy	Was the grant awarded on or after 1st May 2018
Grant code	Unique code allocated by Wellcome
Trial Title	Title of the trial either from application or registry
Grantholder Organisation	Host institution where grantholder is employed
Grant Type	Wellcome grant category
Grant Start Date	Grant start date from Wellcome database
Grant End Date	Grant End Date from Wellcome database
Trial registry ID	Trial registry ID as reported by grantholder
Trial registry	Trial registry
Trial start date	Trial start date from registry entry
Trial end date	Trial end date from registry entry
APR or EoG report 2018-19	Annual progress report or End of Grant report completed and submitted to Wellcome for 2018-20
Protocol available	Grantholder reported to Wellcome that the protocol is published publically
SAP available	Grantholder reported to Wellcome that the SAP is published publically
Summary results posted	Summary results are available on the registry where the trial is registered
Plan to share IPD	Plan to share individual patient/participant data as written on registry entry or report to Wellcome
Wellcome listed as a funder/collaborator on registry?	Wellcome listed as a funder/collaborator on the trial registry entry
Grant no listed on registry?	Wellcome unqiue grant code listed on the trial registry entry

## Sheet: Analysis
Trial registry ID	Not started yet
Row Labels	Count of ID
No	7
Yes	33
Grand Total	40				Count unique grant IDs	185
